# Supplementary material
Source: HighWire-hosted journal article supplement (http://ajnr-stage2.highwire.org/highwire/filestream/181371/field_highwire_adjunct_files/1/Table_2.pdf)
Supplement: Table_2.pdf [file Table_2.pdf]

**Table 2**

Time to MRI enhancement after completion of radiation therapy, subsequent clinical course, and radiographic development

| patient no.<br>(tumor grade) | Time to<br>enhancement<br>after RT<br>(months) | clinical course after MRI<br>enhancement                                | Follow-up MRI findings after initial<br>MRI enhancement  |
|------------------------------|------------------------------------------------|-------------------------------------------------------------------------|----------------------------------------------------------|
| <b>RECURRENCE GROUP</b>      |                                                |                                                                         |                                                          |
| # 1 (IV) H                   | 1 mo                                           | clinical deterioration /<br>deceased 2 mo after detection               | marked progression                                       |
| # 2 (IV) H                   | 2 mo                                           | clinical deterioration /<br>deceased 4 mo after detection               | marked progression                                       |
| # 3 (IV)                     | 2 mo                                           | progressive functional deterioration                                    | marked progression over 4 mo                             |
| # 4 (IV)                     | 7 mo                                           | clinical deterioration /<br>deceased 3 mo after detection               | marked progression                                       |
| # 5 (III) H                  | 2 mo                                           | clinical deterioration /<br>deceased 3 mo after detection               | marked progression                                       |
| # 6 (IV) H                   | 1 mo                                           | clinical deterioration                                                  | marked progression                                       |
| # 7 (III)                    | 48 mo                                          | restarted on chemotherapy after 4 mo /<br>stable                        | continued progression over 6 mo                          |
| # 8 (IV)                     | 7 mo                                           | clinical deterioration / deceased 4 mo<br>after detection               | marked progression over 3 mo                             |
| # 9 (IV)                     | 16 mo                                          | restarted on chemotherapy after 3 mo /<br>deceased 5 mo after detection | marked progression over 4 mo                             |
| # 10 (IV)                    | 2 mo                                           | progressive functional deterioration                                    | continued progression over 8 mo                          |
| # 11 (III) H                 | 27 mo                                          | clinically stable                                                       | continued progression over 13 mo                         |
| # 12 (III)                   | 13 mo                                          | restarted on chemotherapy /<br>progressive functional deterioration     | continued progression over 9 mo                          |
| <b>NON-RECURRENCE GROUP</b>  |                                                |                                                                         |                                                          |
| # 13 (III) H                 | 24 mo                                          | clinically stable                                                       | enhancement stable > 8 mo                                |
| # 14 (III)                   | 2 mo                                           | clinically stable                                                       | enhancement stable > 20 mo                               |
| # 15 (III) H                 | 16 mo                                          | deceased of unrelated disease                                           | enhancement stable > 6 mo /<br>less enhancement post HBO |
| # 16 (III)                   | 14 mo                                          | clinically stable                                                       | enhancement stable > 12 mo /<br>no enhancement post HBO  |
| # 17 (III)                   | 3 mo                                           | clinically stable                                                       | enhancement stable > 10 mo                               |
| # 18 (III)                   | 32 mo                                          | clinically stable                                                       | enhancement stable > 20 mo                               |

H = histological verification by either biopsy or resection

HBO = hyperbaric oxygen therapy
